# Supplementary material
Source: HighWire-hosted journal article supplement (https://svn.bmj.com/content/svn-2018-000224)
Supplement: inline-supplementary-material-1 [file inline-supplementary-material-1.pdf]

eTable 1: Scoring System by Component of the Alternative Healthy Eating Index (AHEI) 2010 and Median Component Score in Patients with Stroke or TIA

| Dietary Component         | Units        | High Diet Quality, AHEI Score 10 | Low Diet Quality AHEI Score, 0 | Median AHEI Score in 95 Patients with Stroke/TIA (IQR) |
|---------------------------|--------------|----------------------------------|--------------------------------|--------------------------------------------------------|
| Vegetables                | Servings/day | ≥5                               | 0                              | 3 (2 – 5)                                              |
| Fruits                    | Servings/day | ≥4                               | 0                              | 5 (3-8)                                                |
| Nuts and legumes          | Servings/day | ≥1                               | 0                              | 3 (0, 6)                                               |
| Whole grains*             | Servings/day | ≥6 men<br>≥5 women               | 0                              | 1 (0 – 2)                                              |
| Trans fat                 | % of energy  | ≤0.5                             | ≥4                             | 9 (8 – 9)                                              |
| Long chain (n-3) fats     | Mg/day       | ≥250                             | 0                              | 3 (2-7)                                                |
| Polyunsaturated fats      | %            | ≥10                              | ≤2                             | 8 (6-10)                                               |
| Alcohol                   | Drinks/day   | 0.5- 2 men<br>0.5-1.5 women      | ≥3.5 men<br>≥2.5 women         | 3 (3 – 8)                                              |
| Red/processed meat        | Servings/day | 0                                | ≥1.5                           | 6 (2 – 8)                                              |
| Sugar sweetened beverages | Servings/day | 0                                | ≥1                             | 0 (0 - 8)                                              |
| Sodium**                  | Grams/day    | <1.4                             | >4.9                           | 5 (2 – 8)                                              |

IQR = interquartile range

Intermediate intakes were scored between 0 and 10

\*Modified from AHEI-2010 to include servings, rather than grams, which was not available with FFQ

\*\*Defined by the lowest decile and the highest decile of the cohort
